# Supplementary material
Source: publisher site journal article supplement (https://www.spandidos-publications.com/5730/downloadSupplementary)

Figure S1. Proof of transfection. (A) Expression of agomiR-871 and agomiR-NC was assessed in neuronal cells using RT-qPCR. (B) Expression of sh-nc and sh-circ\_0000018 was assessed in cerebral tissue from transient middle cerebral artery occlusion using RT-qPCR. RT-qPCR, reverse transcription-quantitative PCR.

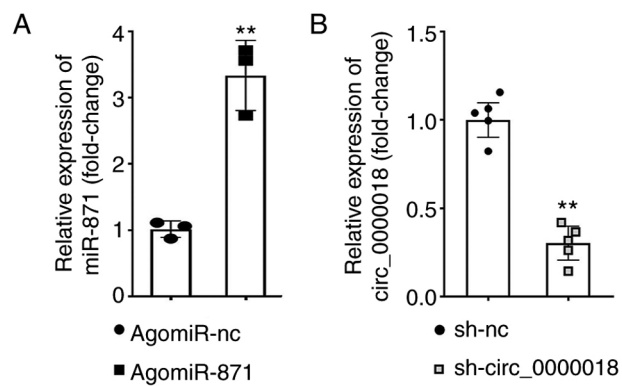

Supplement: Supplementary file 1 [file downloadSupplementary]
